# Supplementary material
Source: HighWire-hosted journal article supplement (https://www.cmaj.ca/highwire/filestream/57949/field_highwire_adjunct_files/0/support-lipman-online_appendix.pdf)
Supplement: support-lipman-online_appendix.pdf [file support-lipman-online_appendix.pdf]

## Online appendix

### **e-Appendix 1:** Sociodemographic and outcome measures used to evaluate the effectiveness of a community-based program of group sessions offering social support and education to single mothers of young children

| Measure                                   | Definition                                                                                                                                                                                                                                                                                                                                                                                                                                                |
|-------------------------------------------|-----------------------------------------------------------------------------------------------------------------------------------------------------------------------------------------------------------------------------------------------------------------------------------------------------------------------------------------------------------------------------------------------------------------------------------------------------------|
| <b>Sociodemographic</b>                   |                                                                                                                                                                                                                                                                                                                                                                                                                                                           |
| Maternal age                              | Years                                                                                                                                                                                                                                                                                                                                                                                                                                                     |
| Treatment of “nerves”                     | Whether mother had been treated for “nerves” or a nervous condition in last 6 mo                                                                                                                                                                                                                                                                                                                                                                          |
| Education                                 | Highest grade or level of education completed by mother (elementary school; some secondary school; secondary school; some postsecondary education; postsecondary education)                                                                                                                                                                                                                                                                               |
| Employment                                | Worked at a job or business any time in the past year                                                                                                                                                                                                                                                                                                                                                                                                     |
| Income                                    | Approximate income in the past year (< \$10 000; \$10 000–\$14 999; \$15 000–19 999; \$20 000–\$24 999; ≥ \$25 000)                                                                                                                                                                                                                                                                                                                                       |
| Financial pressure                        | Feels “money is a struggle”                                                                                                                                                                                                                                                                                                                                                                                                                               |
| Sources of financial support in past year | How mother supported herself and family during past year (wages or salaries; government social assistance [family]; other [e.g., child support payments])                                                                                                                                                                                                                                                                                                 |
| <b>Outcome*</b>                           |                                                                                                                                                                                                                                                                                                                                                                                                                                                           |
| Mood                                      | Center for Epidemiologic Studies Depression (CES-D) Scale: <sup>43</sup> a 20-item self-report measure of psychological distress, including cognitive, affective and behavioural “state” of depression and respective frequencies. Score range 0–60 (change of 6 = medium effect; a score > 16 is recommended for classifying depression in the general population <sup>44</sup> ); internal consistency = 0.84–0.90; test–retest reliability = 0.48–0.67 |
| Self-esteem                               | Rosenberg Self-esteem Scale: <sup>45</sup> a 10-item self-report measure of self-esteem or psychological coping. Score range 10–40 (change of 2.6 = medium effect); internal consistency = 0.86; test–retest reliability = 0.65                                                                                                                                                                                                                           |
| Social support                            | Social Provisions Scale: <sup>46</sup> a 24-item self-report measure of perceived support for guidance, reliable alliance (assurance that others can be counted on in times of stress), reassurance of worth, attachment (emotional closeness), social integration and opportunity for nurturance (providing assistance to others). Score range 24–96 (change of 5.5 = medium effect); internal consistency = 0.65–0.76                                   |
| Parenting                                 | Parenting Scale: <sup>47</sup> a self-report measure of dysfunctional discipline practices in parents with young children. Score range 30–210; internal consistency = 0.63–0.84; test–retest reliability 0.79–0.84                                                                                                                                                                                                                                        |

\*All outcomes were scored to reflect poor functioning (higher score is worse).
